# Supplementary material for: Which outcomes should be included in a core outcome set for capturing and measuring doctor well-being? A Delphi study
Source: bioRxiv or medRxiv preprint supplement (doi:10.1101/2024.04.11.24305668), 2024-04-12
Supplement: Supplementary file [file media-1.pdf]

**Supplementary Materials 4:**

**Table A.** Outcome ratings from Delphi survey Round 1 (n = 59)

| Domain                                            | Outcome                               | Limited Importance (%) | Important (%) | Critically Important (%) |
|---------------------------------------------------|---------------------------------------|------------------------|---------------|--------------------------|
| Overall appraisal of wellbeing                    | General Wellbeing                     | 0.0                    | 15.3          | 74.6                     |
|                                                   | Meaning in life                       | 1.7                    | 50.8          | 39.0                     |
|                                                   | Life satisfaction                     | 3.4                    | 42.4          | 45.8                     |
|                                                   | Quality of life                       | 0.0                    | 33.9          | 57.6                     |
|                                                   | Wellness                              | 0.0                    | 35.6          | 55.9                     |
| Functional component of wellbeing                 | Vitality                              | 1.7                    | 59.3          | 32.2                     |
|                                                   | Optimism                              | 0.0                    | 64.4          | 28.8                     |
|                                                   | Personality                           | 20.3                   | 57.6          | 13.6                     |
|                                                   | Health                                | 0.0                    | 32.2          | 62.7                     |
|                                                   | Physiological function                | 11.9                   | 40.7          | 39.0                     |
|                                                   | Cognitive function                    | 8.5                    | 28.8          | 54.2                     |
|                                                   | Self-esteem                           | 5.1                    | 30.5          | 59.3                     |
|                                                   | Sleep                                 | 0.0                    | 32.2          | 62.7                     |
|                                                   | Financial security                    | 6.8                    | 49.2          | 37.3                     |
| Activity and participation component of wellbeing | Novelty                               | 23.7                   | 59.3          | 11.9                     |
|                                                   | Positive relationships                | 6.8                    | 32.2          | 61.0                     |
|                                                   | Sexual wellbeing                      | 22.0                   | 67.8          | 8.5                      |
|                                                   | Recreational activity                 | 5.1                    | 57.6          | 35.6                     |
|                                                   | Diet                                  | 5.1                    | 66.1          | 28.8                     |
|                                                   | Physical activity                     | 3.4                    | 61.0          | 35.6                     |
|                                                   | Engagement with preventative medicine | 20.3                   | 54.2          | 23.7                     |
| Work-related wellbeing                            | Financial reward satisfaction         | 10.2                   | 66.1          | 16.9                     |
|                                                   | Personal safety                       | 3.4                    | 22.0          | 67.8                     |
|                                                   | Psychological need satisfaction       | 0.0                    | 33.9          | 57.6                     |
|                                                   | Psychological safety                  | 5.1                    | 33.9          | 55.9                     |
|                                                   | Job satisfaction                      | 0.0                    | 27.1          | 67.8                     |
|                                                   | Morale                                | 0.0                    | 28.8          | 66.1                     |
|                                                   | Engagement                            | 0.0                    | 54.2          | 40.7                     |
|                                                   | Life work balance                     | 0.0                    | 20.3          | 74.6                     |
|                                                   | Workability                           | 5.1                    | 52.5          | 23.7                     |
|                                                   | Self-care                             | 0.0                    | 39.0          | 52.5                     |
|                                                   | Professional Development              | 1.7                    | 54.2          | 39.0                     |
|                                                   | Identification with work              | 10.2                   | 61.0          | 20.3                     |
|                                                   | Resilience                            | 5.1                    | 52.5          | 33.9                     |
|                                                   | Emotional intelligence                | 6.8                    | 52.5          | 33.9                     |
|                                                   | Voice and influence                   | 8.5                    | 47.5          | 37.3                     |
|                                                   | Confidence in leadership              | 1.7                    | 47.5          | 45.8                     |
| Recognition satisfaction                          | 3.4                                   | 52.5                   | 37.3          |                          |
| Health and social care specific wellbeing         | Compassion satisfaction               | 1.7                    | 45.8          | 44.1                     |
|                                                   | Altruism                              | 11.9                   | 62.7          | 20.3                     |
|                                                   | Satisfaction with patient care        | 0.0                    | 42.4          | 54.2                     |
|                                                   | Job plan/rota/rotation satisfaction   | 0.0                    | 40.7          | 55.9                     |
|                                                   | Good clinical practice                | 0.0                    | 27.1          | 69.5                     |

**Table B.** Outcome ratings from Delphi survey Round 2 (n = 52)

| Domain                                            | Outcome                               | Limited Importance (%) | Important (%) | Critically Important (%) |
|---------------------------------------------------|---------------------------------------|------------------------|---------------|--------------------------|
| Overall appraisal of wellbeing                    | General Wellbeing                     | 0.0                    | 2.1           | 97.9                     |
|                                                   | Meaning in life                       | 2.1                    | 68.8          | 29.2                     |
|                                                   | Life satisfaction                     | 2.1                    | 60.4          | 37.5                     |
|                                                   | Quality of life                       | 0.0                    | 45.8          | 54.2                     |
|                                                   | Wellness                              | 0.0                    | 33.3          | 66.7                     |
| Functional component of wellbeing                 | Vitality                              | 0.0                    | 81.3          | 18.8                     |
|                                                   | Optimism                              | 0.0                    | 85.4          | 14.6                     |
|                                                   | Personality                           | 12.5                   | 83.3          | 4.2                      |
|                                                   | Health                                | 0.0                    | 25.0          | 75.0                     |
|                                                   | Physiological function                | 2.1                    | 70.8          | 22.9                     |
|                                                   | Cognitive function                    | 0.0                    | 37.5          | 60.4                     |
|                                                   | Self-esteem                           | 4.2                    | 22.9          | 72.9                     |
|                                                   | Sleep                                 | 0.0                    | 29.2          | 70.8                     |
|                                                   | Financial security                    | 2.1                    | 64.6          | 33.3                     |
| Activity and participation component of wellbeing | Novelty                               | 16.3                   | 79.6          | 4.1                      |
|                                                   | Positive relationships                | 0.0                    | 34.7          | 65.3                     |
|                                                   | Sexual wellbeing                      | 18.4                   | 77.6          | 4.1                      |
|                                                   | Recreational activity                 | 0.0                    | 83.7          | 16.3                     |
|                                                   | Diet                                  | 0.0                    | 83.7          | 16.3                     |
|                                                   | Physical activity                     | 0.0                    | 81.6          | 18.4                     |
|                                                   | Engagement with preventative medicine | 12.2                   | 77.6          | 10.2                     |
| Work-related wellbeing                            | Financial reward satisfaction         | 0.0                    | 91.7          | 8.3                      |
|                                                   | Personal safety                       | 0.0                    | 22.9          | 77.1                     |
|                                                   | Psychological need satisfaction       | 0.0                    | 31.3          | 66.7                     |
|                                                   | Psychological safety                  | 2.1                    | 50.0          | 47.9                     |
|                                                   | Job satisfaction                      | 0.0                    | 14.6          | 85.4                     |
|                                                   | Morale                                | 0.0                    | 16.7          | 83.3                     |
|                                                   | Engagement                            | 0.0                    | 64.6          | 35.4                     |
|                                                   | Life work balance                     | 0.0                    | 6.3           | 93.8                     |
|                                                   | Workability                           | 2.1                    | 75.0          | 16.7                     |
|                                                   | Self-care                             | 0.0                    | 47.9          | 50.0                     |
|                                                   | Professional Development              | 0.0                    | 70.8          | 29.2                     |
|                                                   | Identification with work              | 2.1                    | 83.3          | 14.6                     |
|                                                   | Resilience                            | 4.2                    | 62.5          | 33.3                     |
|                                                   | Emotional intelligence                | 2.1                    | 66.7          | 31.3                     |
|                                                   | Voice and influence                   | 0.0                    | 60.4          | 39.6                     |
|                                                   | Confidence in leadership              | 0.0                    | 31.3          | 68.8                     |
|                                                   | Recognition satisfaction              | 0.0                    | 68.8          | 31.3                     |
|                                                   | Compassion satisfaction               | 2.1                    | 68.8          | 29.2                     |

|                                           |                                     |      |      |      |
|-------------------------------------------|-------------------------------------|------|------|------|
| Health and social care specific wellbeing | Altruism                            | 10.4 | 79.2 | 10.4 |
|                                           | Satisfaction with patient care      | 0.0  | 47.9 | 52.1 |
|                                           | Job plan/rota/rotation satisfaction | 0.0  | 56.3 | 43.8 |
|                                           | Good clinical practice              | 0.0  | 10.4 | 89.6 |
