# Supplementary material for: Which outcomes should be included in a core outcome set for capturing and measuring doctor well-being? A Delphi study
Source: bioRxiv or medRxiv preprint supplement (doi:10.1101/2024.04.11.24305668), 2024-04-12
Supplement: Supplementary file [file media-3.pdf]

## Supplementary Materials 2

### Stakeholder organisations

- The symbol  $\geq$  is used for n as the classification of the individuals and organisations into stakeholder groups was undertaken by the author.
1. Those who could use COS-DR in their research - based on that, they have previously published doctor well-being research individually ( $n \geq 15$ ) or as an organisation ( $n \geq 5$ ).
    - British Medical Association
    - Health Education and Improvement Wales
    - Health Education England
    - Kings' Fund
    - Practitioner Health Programme
  2. Organisations that measure doctor well-being in the NHS in the UK every year ( $n \geq 3$ ).
    - British Medical Association
    - General Medical Council
    - Practitioner Health Programme
    - Royal College of Physicians
  3. Professionals with experience of managing doctor wellbeing individually, including doctors, nurses, psychologists, and liaison advisors ( $n \geq 8$ ) and organisations ( $n \geq 2$ ).
    - British Medical Association
    - Practitioner Health Programme
  4. Doctors individually ( $n=48$ ) and organisations representing them ( $n \geq 12$ )
    - Association of Anaesthetists
    - British Association of Physicians of Indian Origin
    - British Medical Association
    - Faculty of Occupational Medicine
    - Health Education and Improvement Wales
    - Health Education England
    - Kings' Fund
    - Practitioner Health Programme
    - Royal College of General Practitioners
    - Royal College of Paediatric and Child Health
    - Royal College of Physicians.
